# Supplementary material for: The effect of carbonate mineral additions on biogeochemical conditions in surface sediments and benthic–pelagic exchange fluxes
Source: Copernicus journal article supplement (doi:10.5194/bg-22-641-2025), 2025-02-05
Supplement: Supplementary file 1 [file bg-22-641-2025-supplement.pdf]

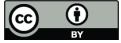

*Supplement of*

## **The effect of carbonate mineral additions on biogeochemical conditions in surface sediments and benthic–pelagic exchange fluxes**

**Kadir Biçe et al.**

*Correspondence to:* Kadir Biçe (bicekadir@gmail.com) and Christof Meile (cmeile@uga.edu)

The copyright of individual parts of the supplement might differ from the article licence.

1 **Supplementary Materials**

2 *Experimental setup*

3

4

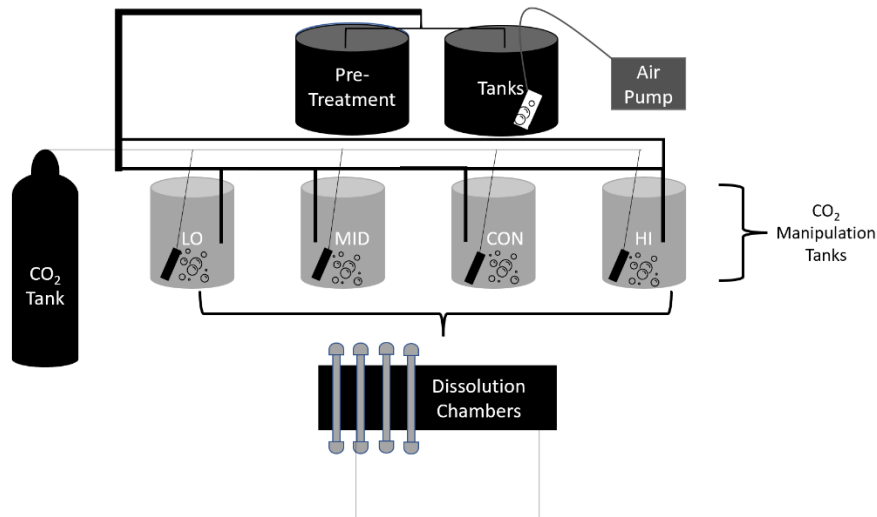

5

6 **Figure S1:** Simplified schematic of the flow through feedback-controlled seawater system used  
7 for the mineral dissolution experiments. The pre-treatment tanks contained seawater filtered to 5  
8 microns from Yaquina Bay and were vigorously bubbled with ambient air. Water was pumped  
9 from the pre-treatment tanks to the CO<sub>2</sub> manipulation tanks (Lo, Mid, Con, Hi) and excess water  
10 was then circulated back. CO<sub>2</sub> treatment tanks were manipulated using lab-grade CO<sub>2</sub> to generate  
11 specific  $\Omega_{\text{calcite}}$  in a feedback-controlled system measuring  $\text{pH}_{(\text{NBS})}$ . The pH in each CO<sub>2</sub>  
12 manipulation tank was monitored using an Apex-Controller manipulation system (Neptune  
13 Systems Energy Bar 832 interfaced with an Apex Controller Base Unit and pH/ORP probe  
14 modules: PM1). One double junction pH probe was located in the recirculation return line in each  
15 CO<sub>2</sub> manipulation tank. All pH probes were calibrated at the beginning of each experiment using  
16 pH 4, 7, and 10 NBS buffers, to obtain a three-point calibration curve.

17

18 **Table S1:** Table of measured TCO<sub>2</sub>, pCO<sub>2</sub>, Temperature (T), Salinity (S), measured  $\text{pH}_{\text{NBS}}$  and  
19 subsequently calculated saturation state ( $\Omega_{\text{calcite}}$ ) from seawater tank discrete ( $\text{pCO}_2/\text{TCO}_2$ )  
20 samples associated with our flow through feedback-controlled seawater system. For each  
21 dissolution trial, a total of four  $\text{pCO}_2/\text{TCO}_2$  samples were used. Measurements following  
22 procedures from Bandstra et al. (2006), modified for discrete samples as in Hales et al. (2005),  
23 Barton et al., (2012), and Hales et al. (2017). The temperature (°C) listed is from in situ  
24 measurements recorded from within the water treatment tanks (does not reflect experimental  
25 temperatures)

| TCO <sub>2</sub><br>( $\mu\text{mol/kg}$ ) | pCO <sub>2</sub><br>( $\mu\text{atm}$ ) | T ( $^{\circ}\text{C}$ ) | Salinity | Measured<br>pH <sub>NBS</sub> | Calculated<br>$\Omega_{\text{calcite}}$ |
|--------------------------------------------|-----------------------------------------|--------------------------|----------|-------------------------------|-----------------------------------------|
| 2530.7                                     | 8589.3                                  | 18                       | 33.1     | 6.85                          | 0.25                                    |
| 2340.1                                     | 4569.2                                  | 18                       | 33.2     | 7.14                          | 0.45                                    |
| 2291.5                                     | 2537.9                                  | 19                       | 33.4     | 7.28                          | 0.85                                    |
| 2252.8                                     | 1946.2                                  | 18                       | 33.2     | 7.46                          | 1.03                                    |

26

27 The correlation between measured benchtop pH data and the pH data from the experimental system  
 28 for header tanks in all experiments was consistently an  $R^2$  greater than 0.9 across all experiments  
 29 (Figure S2).

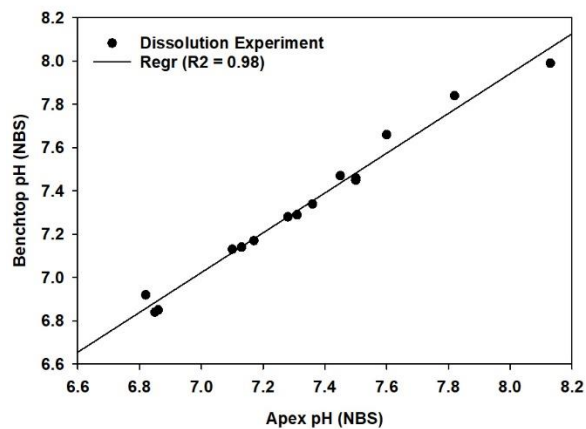

30

31 **Figure S2:** Measured pH<sub>NBS</sub> from a benchtop probe and the pH<sub>NBS</sub> from the experimental system  
 32 in the flowthrough feed-back controlled seawater system tanks

33

### 34 *Effect of the dilution due to mineral addition*

35 We carried out addition simulations in which we assumed that the addition of minerals at the top  
 36 replaces OM, lowering the OM concentration in the top 2 cm. To estimate the potential impact  
 37 of dilution due to replacing OM with PIC, we simulated OM as state variable and using a rate  
 38 expression  $R_C = k \cdot \text{OM}$ , replacing the imposed OM reaction rates  $R_C = R_C^0 \cdot \exp(-x/\gamma_{\text{om}})$ . We  
 39 assumed that the proportion of addition of PIC is the same as removal of the OM (i.e., adding 8%  
 40 of mineral means lowering OM concentration by 8%). The rate constant  $k$  was set to  $0.25 \text{ yr}^{-1}$ ,  
 41 chosen to approximate the rates computed in the  $R_C(z)$  approach. Flux of carbon was taken from  
 42 literature as  $\sim 510 \mu\text{mol cm}^{-2} \text{ yr}^{-1}$  (Thullner et al., 2009).

43 Figure S3 shows before and after the addition of minerals when dilution is present. We compared  
 44 these results against a simulation with dilution turned off. The impact of dilution was minimal  
 45 with slight reductions observed mainly in OM mineralization processes which resulted in  
 46 decreases in TA production rates. Production of TA production was reduced by 17 and  $33 \mu\text{mol}$   
 47  $\text{cm}^{-2} \text{ yr}^{-1}$  for 8% and 16% applications respectively.

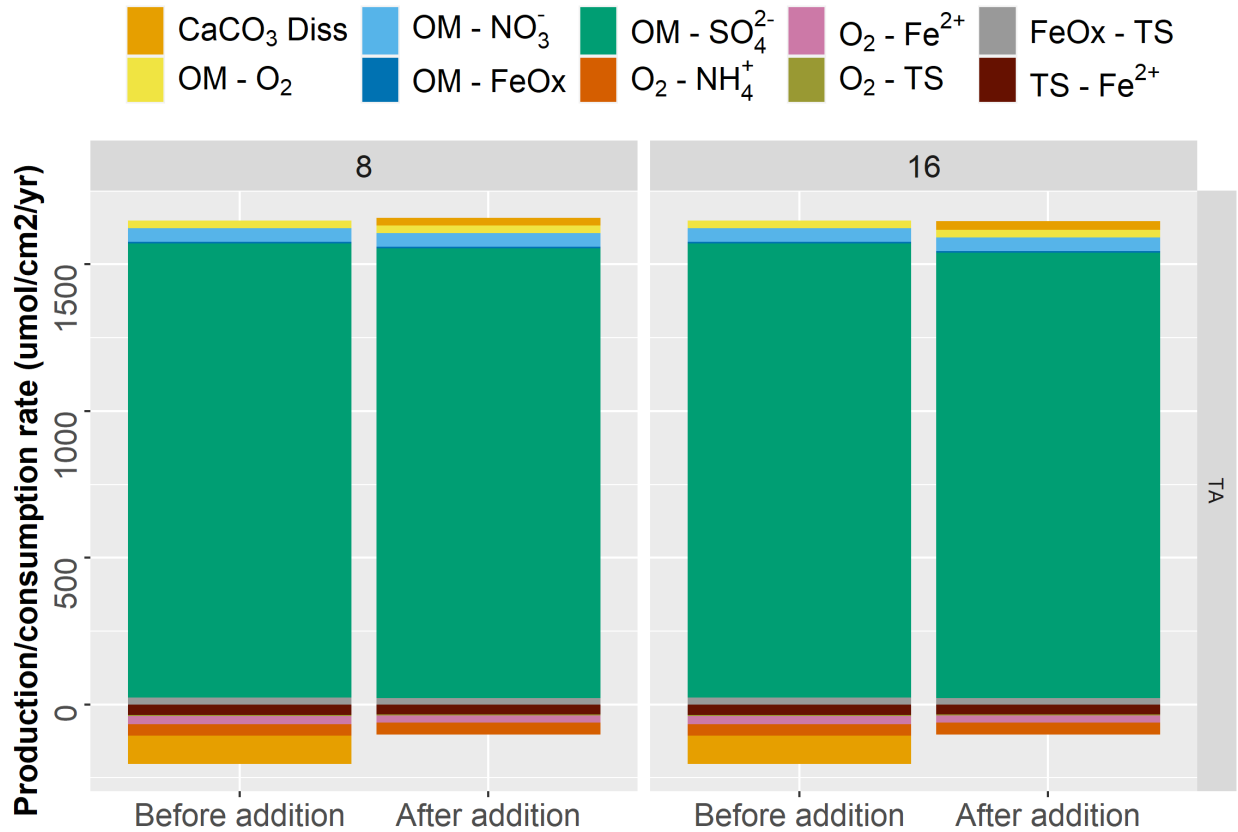

48 **Figure S3.** Production of TA for different amounts of mineral added when dilution is considered  
 49 (8 = 8% mineral addition, 16 = 16% mineral addition).  
 50

51  
 52 *The buffering factor ( $d\text{pH}/d\text{TA}$ )*

53 We also computed  $d\text{pH}/d\text{TA}$  as the buffering factor (Figure S4). We observed decreasing values  
 54 of  $d\text{pH}/d\text{TA}$  with time in all scenarios. This illustrates that as buffering develops and TA levels  
 55 are higher, a further increase in TA has a reduced impact on pH. Deeper mixed layer (high ML)  
 56 showed larger values which are due to elevated mixing of minerals leading to increases in the  
 57 impact of dissolution-based TA production on pH. After 2 years, the low  $R_c^0$  scenario produced  
 58 slightly negative  $d\text{pH}/d\text{TA}$  which hinted to the suppression of mineral dissolution due to less  
 59 acidification (i.e., although smaller, TA production is done by OM mineralization which also  
 60 decreases pH).

61

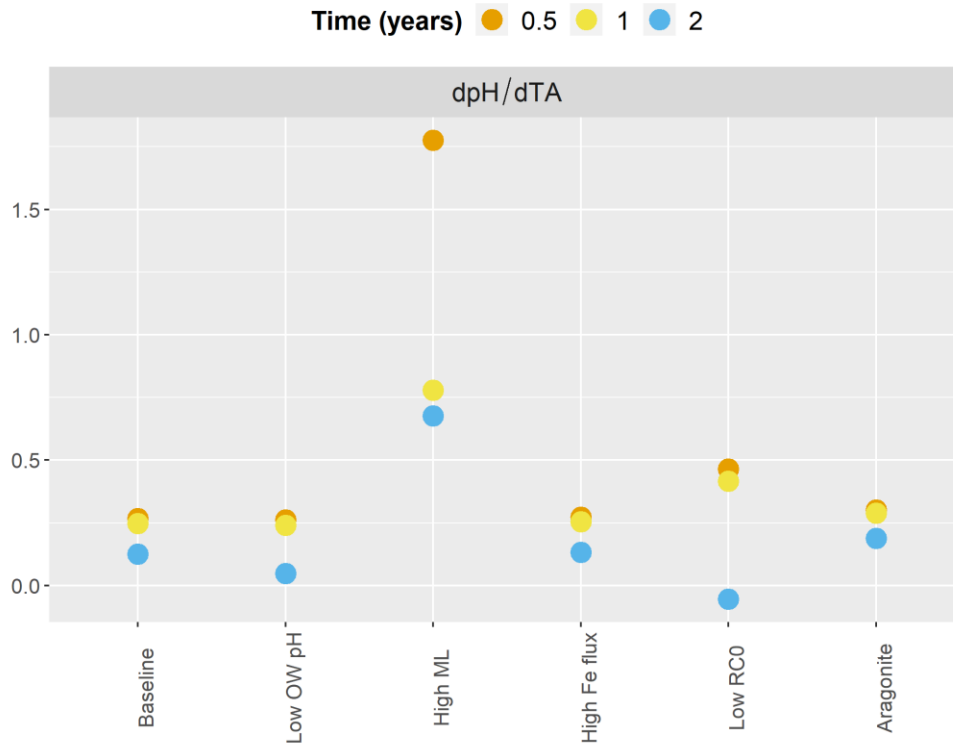

62

63

**Figure S4:** dpH/dTA for different scenarios at the top 10cm of the sediment

64

*Box model for atmospheric DIC uptake*

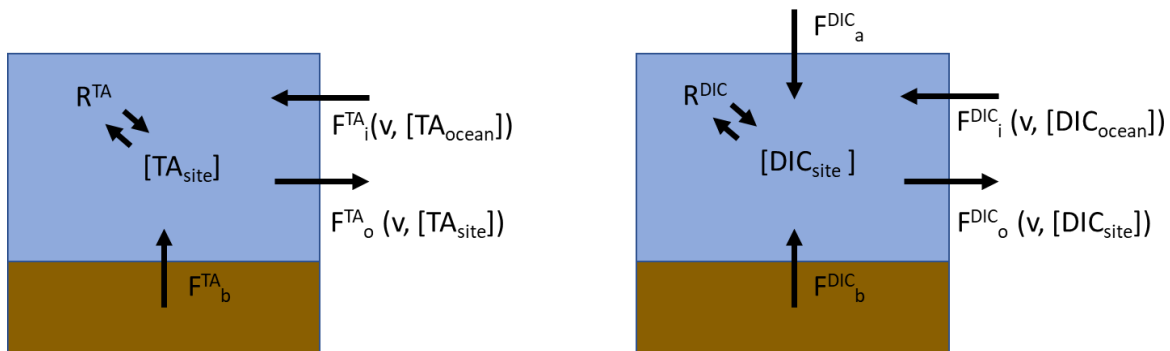

65

66

**Figure S5:** Schematic of water column TA and DIC fluxes for Yaquina Bay.

67

68

69

The water exchange rate was approximated from measurements of water height. Using a 3 m semidiurnal tidal range from NOAA South Beach, OR (Station ID: 9435380) station, a representative exchange velocity is  $2.1 \cdot 10^5$  cm/yr.

70

71

72

73

For pre-addition scenario, benthic TA and DIC fluxes were taken from the model as 1100 and  $1121 \mu\text{mol cm}^{-2} \text{ yr}^{-1}$  respectively. TA mass balance equation was solved for  $R^{TA}$  using  $[TA_{ocean}]$  as 2.2 and  $[TA_{site}]$  as  $1.9 \text{ mmol L}^{-1}$  (measured at Hatfield Marine Station). Then,  $R^{DIC}$  was estimated using  $R^{TA}$  with respiration producing  $\text{NO}_3^-$ /primary production consuming  $\text{NO}_3^-$ .

74 (coupled respiration and nitrification).  $[DIC_{site}]$  and  $[DIC_{ocean}]$  were calculated using site and  
75 ocean TA and pH using aquaenv R package as 1.8 and 2.1  $\mu\text{mol cm}^{-3}$  respectively. Lastly,  $F_a^{DIC}$   
76 was estimated by DIC mass balance.

77 After the addition of minerals, benthic fluxes were 1227 and 1185  $\mu\text{mol cm}^{-2} \text{yr}^{-1}$  for TA and DIC.  
78  $[TA_{site}]$  and  $[DIC_{site}]$  were recalculated using mass balance with  $R^{TA}$  and  $R^{DIC}$ . pH of the site was  
79 assumed to be constant from pre-addition and the resulting changes in  $[TA_{site}]$  and  $[DIC_{site}]$  were  
80 in the order of  $10^{-3} \mu\text{mol/cm}^3$ . This assumption was in line with Hickey & Banas (2003) who state  
81 that the estuarine water column biogeochemical processes are driven by oceanic source water and  
82 process, given the large tidal prism and relatively small volume in this and other Pacific Northwest  
83 estuaries.

84 The flux of  $\text{CO}_2$  between the atmosphere and the water showed that the bay is net heterotrophic  
85 with emission fluxes of 458352 and 458294  $\mu\text{mol cm}^{-2} \text{yr}^{-1}$  before and after the addition,  
86 respectively. Impact of buffering on  $F_a^{DIC}$  was calculated as additional 58  $\mu\text{mol cm}^{-2} \text{yr}^{-1}$   $\text{CO}_2$  flux  
87 into the water column during the peak buffering period which is trivial compared to the tidal  $\text{CO}_2$   
88 exchange fluxes. However, scaling these estimates up would produce considerable changes  
89 compared to anthropogenic C in US Pacific coastal waters (Pacella et al., 2024).

90 We explored the sensitivity of air-sea  $\text{CO}_2$  fluxes to the pH in the bay, as well as the magnitude of  
91 the tidal exchange between the bay and the coastal ocean.  $\text{CO}_2$  uptake due to mineral addition was  
92 slightly sensitive to pH in the bay (a change of approximately 1.4  $\mu\text{mol cm}^{-2} \text{yr}^{-1}$  per change in 0.1  
93 pH unit in range 7.86-7.96). However, since the  $\text{CO}_2$  uptake due to mineral additions were  
94 calculated as the difference between two scenarios, altering the tidal input (tidal exchange volume,  
95 dTA, dDIC) did not have a considerable impact on the impact of buffering (not shown).

## 96 **References:**

- 97 Bandstra, L., Hales, B., & Takahashi, T. (2006). High-frequency measurements of total  $\text{CO}_2$ :  
98 Method development and first oceanographic observations. *Marine Chemistry*, 100(1-2), 24-38.
- 99 Barton, A., Hales, B., Waldbusser, G. G., Langdon, C., & Feely, R. A. (2012). The Pacific oyster,  
100 *Crassostrea gigas*, shows negative correlation to naturally elevated carbon dioxide levels:  
101 Implications for near-term ocean acidification effects. *Limnology and oceanography*, 57(3), 698-  
102 710.
- 103 Hales, B., Takahashi, T., & Bandstra, L. (2005). Atmospheric  $\text{CO}_2$  uptake by a coastal upwelling  
104 system. *Global Biogeochemical Cycles*, 19(1).
- 105 Hales, B., Suhrbier, A., Waldbusser, G. G., Feely, R. A., & Newton, J. A. (2017). The carbonate  
106 chemistry of the “fattening line,” Willapa Bay, 2011–2014. *Estuaries and Coasts*, 40, 173-186.
- 107 Hickey, B. M., & Banas, N. S. (2003). Oceanography of the US Pacific Northwest coastal ocean  
108 and estuaries with application to coastal ecology. *Estuaries*, 26, 1010-1031.
- 109 Pacella, S. R., Brown, C. A., Labiosa, R. G., Hales, B., Mochon Collura, T. C., Evans, W., &  
110 Waldbusser, G. G. (2024). Feedbacks between estuarine metabolism and anthropogenic  $\text{CO}_2$

111 accelerate local rates of ocean acidification and hasten threshold exceedances. *Journal of*  
112 *Geophysical Research: Oceans*, 129(3), e2023JC020313.

113 Thullner, M., Dale, A. W., & Regnier, P. (2009). Global-scale quantification of mineralization  
114 pathways in marine sediments: A reaction-transport modeling approach. *Geochemistry,*  
115 *geophysics, geosystems*, 10(10).
